# Supplementary material for: Triphenylamine-embedded copper(ii) complex as a “turn-on” fluorescent probe for the detection of nitric oxide in living animals
Source: Royal Society of Chemistry journal article supplement (doi:10.1039/d2ay01629j), 2022-01-01
Supplement: d2ay01629j1.pdf [file d2ay01629j1.pdf]

Electronic Supplementary Material (ESI) for Analytical Methods.  
This journal is © The Royal Society of Chemistry 2022

**Triphenylamine-embedded copper(II) complex as a “turn-on”  
fluorescent probe for the detection of nitric oxide in living animals†**

Zhuye Shang,<sup>a</sup> Li Shu,<sup>a</sup> Jianhua Liu,<sup>a</sup> Qingtao Meng,<sup>\*a</sup> Yue Wang,<sup>a</sup> Jianguo Sun,<sup>\*b</sup> Run Zhang<sup>c</sup> and  
Zhiqiang Zhang<sup>\*a</sup>

<sup>a</sup> *School of Chemical Engineering, University of Science and Technology Liaoning,  
Anshan, Liaoning Province, 114051, P. R. China*

*E-mail: [qtmeng@ustl.edu.cn](mailto:qtmeng@ustl.edu.cn) (Q. T. Meng), [zzq@ustl.edu.cn](mailto:zzq@ustl.edu.cn) (Z. Q. Zhang), Tel.: +86-  
412-5928002*

<sup>b</sup> *Eye Institute and Department of Ophthalmology & Visual Science, Eye & ENT  
Hospital, Shanghai Medical College, Fudan University, Shanghai, China*

*E-mail: [jgsun@fudan.edu.cn](mailto:jgsun@fudan.edu.cn) (J. G. Sun)*

<sup>c</sup> *Australian Institute for Bioengineering and Nanotechnology, The University of  
Queensland, Brisbane, 4072, Australia*

## **Experimental apparatus**

<sup>1</sup>H NMR and <sup>13</sup>C NMR spectra were recorded with an AVANCE 400 MHz spectrometer (Bruker) with chemical shifts reported as ppm (in DMSO-*d*<sub>6</sub> and Chloroform-*d*, TMS as an internal standard). Atmospheric pressure ionization (API) mass spectra were recorded on an Agilent 6530 QTOF spectrometer. Absorption spectra were tested with a Perkin Elmer Lambda 900 UV/VIS/NIR spectrophotometer. Fluorescence spectra were recorded with a Spectrofluorometer FS5 luminescence spectrometer. All pH measurements were made with an OHAUS Starter 3100/f meter. Imaging of Cu<sup>2+</sup> and NO in mice (6 to 8-week-old) were performed on a SPECTRAL Ami Imaging Systems (Spectral Instruments Imaging, LLC, Tucson, AZ) with an excitation filter 465 nm and an emission filter 630 nm. Amiview Analysis software (Version 1.7.06) was used to calculate fluorescence intensity in region of interest (ROI), and values are presented as the mean ± SD for each group of three experiments.

## **MTT assay of cytotoxicity of the ligand NZ in A549 cells**

The cytotoxicity of the ligand NZ to live A549 cells was detected by MTT assays.<sup>S1</sup> The viability of cell growth was calculated by the following formula:  
Viability (%) = (mean of absorbance value of treatment group-blank)/(mean absorbance value of control-blank)×100.

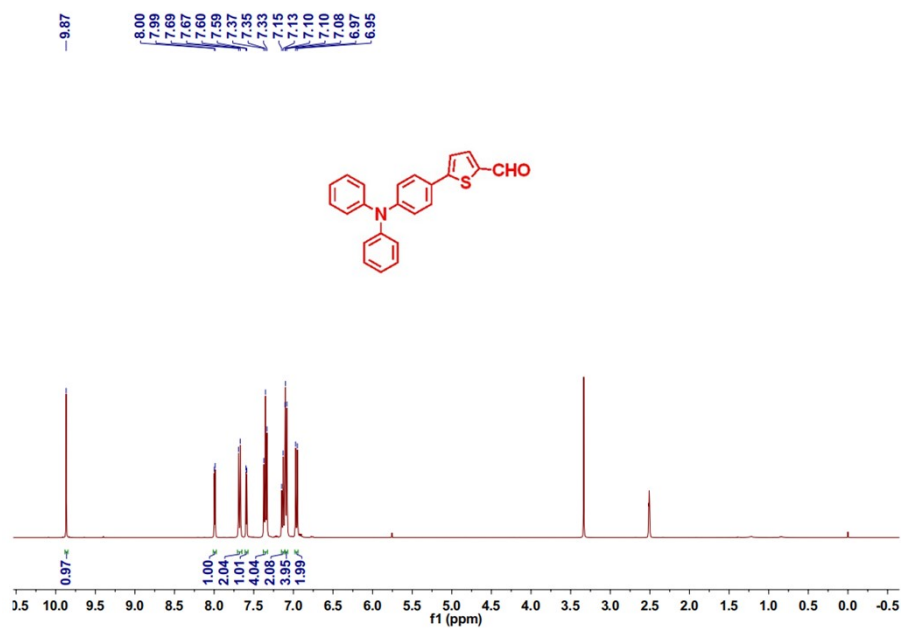

**Fig. S1.** <sup>1</sup>H NMR of 5-(4'-(diphenylamino)phenyl)thiophene-2-carbaldehyde (**M**) (DMSO-*d*<sub>6</sub>, 400 MHz).

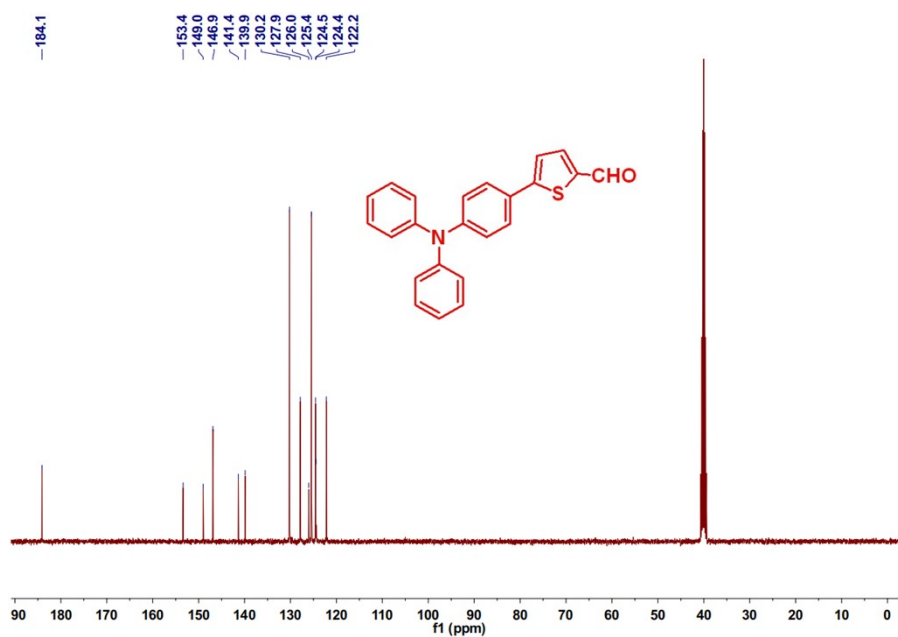

**Fig. S2.** <sup>13</sup>C NMR of 5-(4'-(diphenylamino)phenyl)thiophene-2-carbaldehyde (**M**) (DMSO-*d*<sub>6</sub>, 101 MHz).

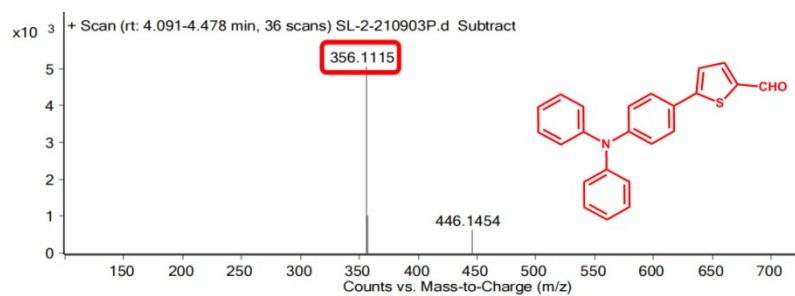

**Fig. S3.** HR-MS of 5-(4'-(diphenylamino)phenyl)thiophene-2-carbaldehyde (**M**).



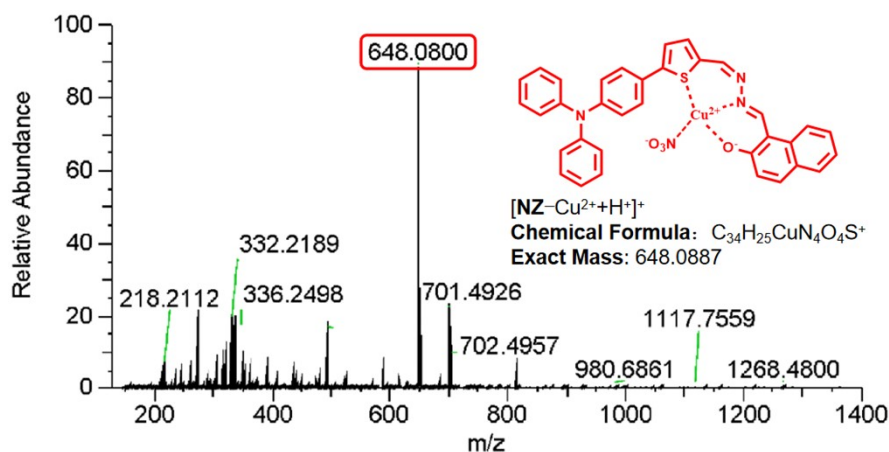

Fig. S7. HR-MS of the probe NZ-Cu<sup>2+</sup>.

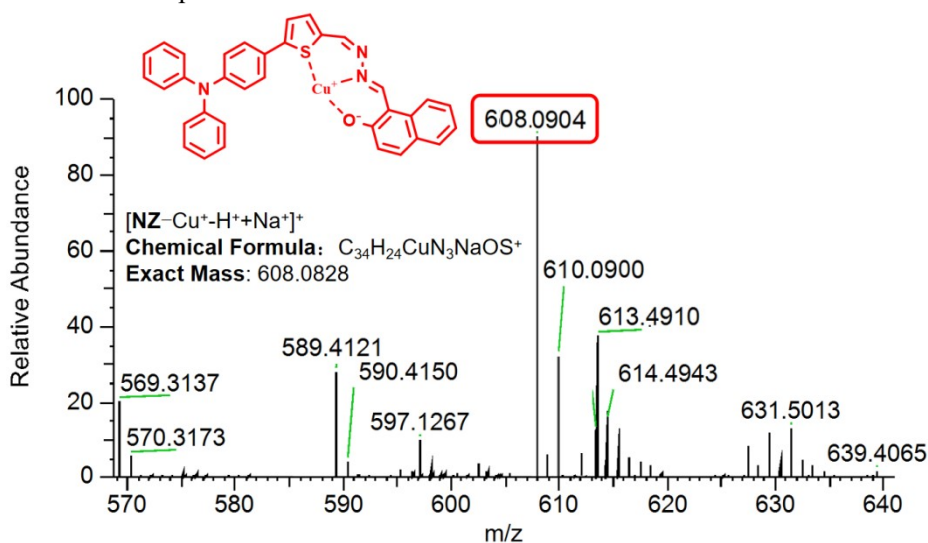

Fig. S8. HR-MS of the probe NZ-Cu<sup>2+</sup> (10  $\mu$ M) in the presence of NO.

Table S1. Cartesian coordinates of NZ in the ground state (S<sub>0</sub>).

| Coordinates (ground state S <sub>0</sub> ) |               |                       |              |              |
|--------------------------------------------|---------------|-----------------------|--------------|--------------|
| Center Number                              | Atomic Number | Forces(Hartrees/Bohr) |              |              |
|                                            |               | X                     | Y            | Z            |
| 1                                          | 6             | 0.000000199           | -0.000000789 | 0.000001469  |
| 2                                          | 6             | -0.000001077          | 0.000001743  | 0.000000126  |
| 3                                          | 6             | -0.000000699          | -0.000001141 | -0.000001858 |
| 4                                          | 6             | 0.000002712           | -0.000008434 | 0.000000297  |
| 5                                          | 6             | -0.000004726          | 0.000005848  | -0.000002285 |
| 6                                          | 6             | 0.000001525           | -0.000001414 | -0.000001768 |
| 7                                          | 7             | -0.000007937          | -0.000002374 | 0.000001165  |
| 8                                          | 6             | -0.000002141          | -0.000003341 | -0.000000762 |
| 9                                          | 6             | 0.000005223           | 0.000009366  | -0.000001234 |
| 10                                         | 6             | 0.000000276           | -0.000002104 | 0.000000786  |
| 11                                         | 6             | 0.000001391           | -0.000000108 | 0.000000262  |
| 12                                         | 6             | 0.000000328           | 0.000000864  | -0.000000267 |

|    |    |              |              |              |
|----|----|--------------|--------------|--------------|
| 13 | 6  | -0.000000934 | -0.000000286 | 0.000000154  |
| 14 | 6  | -0.000000513 | -0.000000083 | -0.000000046 |
| 15 | 6  | -0.000000619 | 0.000001398  | 0.000002713  |
| 16 | 6  | 0.000002125  | 0.000002268  | -0.000001779 |
| 17 | 6  | 0.000000818  | -0.000003207 | -0.000001113 |
| 18 | 6  | -0.000003122 | 0.000001673  | 0.000003432  |
| 19 | 6  | 0.000009535  | 0.000001392  | 0.000001089  |
| 20 | 6  | -0.000013016 | 0.000004893  | 0.000007453  |
| 21 | 16 | 0.000010254  | -0.000011684 | -0.000008893 |
| 22 | 6  | 0.000008838  | -0.000002763 | 0.000004989  |
| 23 | 6  | -0.000018611 | 0.000008695  | 0.000006900  |
| 24 | 6  | 0.000017661  | 0.000008725  | -0.000005709 |
| 25 | 6  | -0.000008579 | -0.000009120 | -0.000009541 |
| 26 | 7  | 0.000000407  | 0.000015586  | 0.000005969  |
| 27 | 7  | 0.00000928   | -0.000011605 | -0.000005774 |
| 28 | 6  | 0.000005126  | 0.000001609  | -0.000001049 |
| 29 | 6  | -0.00000100  | 0.000008509  | 0.000002610  |
| 30 | 6  | -0.00000104  | -0.000001194 | -0.000000829 |
| 31 | 6  | 0.000001146  | -0.000001032 | 0.000000323  |
| 32 | 6  | 0.000004817  | 0.000003845  | 0.000000678  |
| 33 | 6  | -0.000005021 | 0.000000541  | 0.000000738  |
| 34 | 6  | -0.000000146 | -0.000011489 | -0.000005069 |
| 35 | 6  | 0.000002355  | 0.000001559  | 0.000000570  |
| 36 | 6  | -0.000003887 | -0.00000068  | 0.000001788  |
| 37 | 6  | 0.000002041  | -0.000003765 | -0.000002223 |
| 38 | 6  | 0.000003101  | 0.000006028  | 0.000001884  |
| 39 | 8  | 0.000008499  | -0.000006037 | -0.000005539 |
| 40 | 1  | -0.000000348 | 0.000000009  | -0.000000046 |
| 41 | 1  | -0.000000234 | 0.000000114  | -0.000000166 |
| 42 | 1  | 0.000000410  | -0.00000126  | 0.000000120  |
| 43 | 1  | -0.000001280 | -0.000000319 | 0.000000590  |
| 44 | 1  | -0.000000283 | 0.000000043  | 0.000000079  |
| 45 | 1  | 0.000001171  | 0.000000844  | -0.000000454 |
| 46 | 1  | -0.000000007 | -0.000000049 | 0.000000042  |
| 47 | 1  | 0.000000031  | -0.000000213 | 0.000000112  |
| 48 | 1  | 0.000000099  | -0.000000138 | 0.000000290  |
| 49 | 1  | 0.000000058  | 0.000001100  | -0.000000475 |
| 50 | 1  | -0.00000285  | 0.000000200  | -0.00000042  |
| 51 | 1  | 0.000000882  | -0.000001219 | 0.000001657  |
| 52 | 1  | -0.000001234 | 0.000001004  | -0.000001605 |
| 53 | 1  | 0.000000896  | -0.000001708 | 0.000000355  |
| 54 | 1  | 0.000003691  | -0.000002977 | -0.000001663 |
| 55 | 1  | -0.000002945 | -0.000002224 | 0.000000589  |
| 56 | 1  | -0.000001637 | 0.000000752  | 0.000002746  |

|    |   |              |              |              |
|----|---|--------------|--------------|--------------|
| 57 | 1 | -0.000001222 | -0.000001604 | -0.000001296 |
| 58 | 1 | -0.000000487 | 0.000000243  | 0.000000148  |
| 59 | 1 | -0.000000879 | -0.000000005 | -0.000001348 |
| 60 | 1 | -0.000000077 | -0.000000251 | -0.000000008 |
| 61 | 1 | 0.000000556  | 0.000000137  | -0.000000329 |
| 62 | 1 | 0.000000032  | 0.000000368  | 0.000000706  |
| 63 | 1 | -0.000001118 | 0.000000643  | 0.000001362  |
| 64 | 1 | -0.000017813 | 0.000005361  | 0.000009368  |

**Table S2.** Cartesian coordinates of NZ-Cu<sup>2+</sup> in the ground state (S<sub>0</sub>).

| Coordinates (ground state S <sub>0</sub> ) |               |                       |              |              |
|--------------------------------------------|---------------|-----------------------|--------------|--------------|
| Center Number                              | Atomic Number | Forces(Hartrees/Bohr) |              |              |
|                                            |               | X                     | Y            | Z            |
| 1                                          | 6             | -0.000142291          | -0.000130498 | -0.000088202 |
| 2                                          | 6             | 0.000055027           | -0.000249623 | 0.000125371  |
| 3                                          | 6             | 0.000154050           | -0.000056231 | 0.000095988  |
| 4                                          | 6             | -0.000279178          | -0.000093091 | -0.000150361 |
| 5                                          | 6             | 0.000034761           | 0.000166997  | 0.000004257  |
| 6                                          | 6             | -0.000125593          | 0.000225798  | -0.000171380 |
| 7                                          | 7             | 0.000047268           | 0.000006265  | 0.000260620  |
| 8                                          | 6             | -0.000050420          | -0.000014442 | -0.000007146 |
| 9                                          | 6             | 0.000179714           | 0.000011445  | -0.000274497 |
| 10                                         | 6             | -0.000113287          | 0.000170034  | 0.000070198  |
| 11                                         | 6             | -0.000014730          | 0.000193428  | 0.000166510  |
| 12                                         | 6             | 0.000108810           | 0.000166541  | -0.000084181 |
| 13                                         | 6             | 0.000060834           | -0.000218234 | -0.000244604 |
| 14                                         | 6             | -0.000072433          | -0.000110713 | -0.000000342 |
| 15                                         | 6             | 0.000245229           | 0.000043289  | 0.000021528  |
| 16                                         | 6             | 0.000261149           | -0.000037027 | -0.000087028 |
| 17                                         | 6             | -0.000160698          | 0.000321277  | -0.000138202 |
| 18                                         | 6             | -0.000132031          | -0.000006582 | 0.000147429  |
| 19                                         | 6             | -0.000143243          | -0.000103279 | -0.000087503 |
| 20                                         | 6             | 0.001875335           | -0.002276011 | -0.003408398 |
| 21                                         | 16            | -0.004246734          | 0.003528124  | 0.005894095  |
| 22                                         | 6             | 0.000874135           | 0.001053698  | -0.001694075 |
| 23                                         | 6             | -0.000667698          | -0.000074976 | 0.000212561  |
| 24                                         | 6             | 0.000750968           | -0.000530990 | 0.000585862  |
| 25                                         | 6             | 0.000010183           | 0.000143822  | 0.000582982  |
| 26                                         | 7             | -0.000970110          | -0.002318795 | -0.000623241 |
| 27                                         | 7             | -0.002003071          | -0.003610292 | 0.000136281  |
| 28                                         | 6             | 0.000809298           | 0.003714724  | 0.001033208  |
| 29                                         | 6             | 0.000612927           | 0.001603768  | -0.000421315 |

|    |    |              |              |              |
|----|----|--------------|--------------|--------------|
| 30 | 6  | -0.000311238 | -0.000132023 | 0.001295105  |
| 31 | 6  | 0.000116384  | -0.000182680 | -0.000442700 |
| 32 | 6  | -0.000038398 | 0.000285587  | 0.000085323  |
| 33 | 6  | 0.000131384  | 0.000011821  | -0.000183262 |
| 34 | 6  | 0.000217054  | -0.000143260 | -0.000538264 |
| 35 | 6  | -0.000020015 | 0.000233990  | 0.000121487  |
| 36 | 6  | 0.000098867  | 0.000339067  | -0.000066295 |
| 37 | 6  | -0.000208604 | -0.000362233 | 0.000285406  |
| 38 | 6  | -0.000120168 | -0.000123773 | 0.000160136  |
| 39 | 8  | -0.000393931 | -0.00116014  | 0.000356056  |
| 40 | 29 | 0.003689497  | -0.000095705 | -0.002349081 |
| 41 | 8  | -0.001344487 | -0.001489315 | -0.00092767  |
| 42 | 7  | 0.000923344  | 0.002038726  | -0.002779035 |
| 43 | 8  | 0.000133433  | -0.002381949 | 0.002301078  |
| 44 | 8  | -0.000304513 | 0.000282159  | 0.000621756  |
| 45 | 1  | 0.000041638  | 0.000036239  | 0.000026304  |
| 46 | 1  | 0.000011669  | 0.000025582  | -0.000007293 |
| 47 | 1  | -0.000013614 | -0.000039121 | 0.000025176  |
| 48 | 1  | -0.000019389 | -0.000001238 | -0.000037379 |
| 49 | 1  | 0.000003658  | -0.000001288 | 0.000019856  |
| 50 | 1  | 0.000035014  | 0.000032592  | -0.000041999 |
| 51 | 1  | -0.000011841 | -0.00004098  | -0.000022644 |
| 52 | 1  | -0.000012709 | -0.000011283 | 0.000003579  |
| 53 | 1  | 0.000010473  | 0.000023922  | 0.000036897  |
| 54 | 1  | -0.000000214 | 0.000034215  | -0.000020921 |
| 55 | 1  | -0.000030308 | -0.000014060 | 0.000079034  |
| 56 | 1  | -0.000110891 | -0.000025333 | -0.000051479 |
| 57 | 1  | 0.000001634  | 0.000025590  | -0.000007993 |
| 58 | 1  | 0.000028926  | -0.000029615 | 0.000024694  |
| 59 | 1  | 0.000072584  | 0.000010483  | 0.000022909  |
| 60 | 1  | 0.000016652  | -0.000029912 | -0.000009644 |
| 61 | 1  | 0.000159725  | 0.000105811  | 0.000040775  |
| 62 | 1  | 0.000246401  | 0.000180674  | 0.000016246  |
| 63 | 1  | 0.000064837  | 0.000075392  | 0.000032067  |
| 64 | 1  | 0.000078373  | -0.000008926 | 0.000011544  |
| 65 | 1  | -0.000011103 | 0.000036600  | 0.000012440  |
| 66 | 1  | 0.000008750  | -0.000020595 | 0.000011915  |
| 67 | 1  | -0.000010973 | 0.000044970  | 0.000009337  |
| 68 | 1  | -0.000017879 | 0.000027370  | -0.000052996 |

---



**Table S3.** Cartesian coordinates of NZ-Cu<sup>+</sup> in the ground state ( $S_0$ ).

| Coordinates (ground state $S_0$ ) |                  |                        |              |              |
|-----------------------------------|------------------|------------------------|--------------|--------------|
| Center<br>Number                  | Atomic<br>Number | Forces (Hartrees/Bohr) |              |              |
|                                   |                  | X                      | Y            | Z            |
| 1                                 | 6                | 0.000001016            | -0.000000059 | 0.000000479  |
| 2                                 | 6                | -0.000000275           | -0.000000393 | 0.000000879  |
| 3                                 | 6                | -0.000001572           | 0.000003450  | -0.000000249 |
| 4                                 | 6                | -0.000000394           | 0.000000347  | 0.000000197  |
| 5                                 | 6                | 0.000001486            | -0.000002188 | 0.000001913  |
| 6                                 | 6                | -0.000000540           | 0.000000036  | -0.000001038 |
| 7                                 | 7                | 0.000005512            | 0.000006133  | -0.000011093 |
| 8                                 | 6                | 0.000003475            | -0.000005014 | 0.000007457  |
| 9                                 | 6                | -0.000008169           | -0.000003663 | 0.000004736  |
| 10                                | 6                | -0.000000797           | 0.000000698  | -0.000003889 |
| 11                                | 6                | -0.000001422           | -0.000000954 | 0.000000631  |
| 12                                | 6                | 0.000001014            | -0.000000295 | 0.000000367  |
| 13                                | 6                | -0.000000643           | 0.000000682  | -0.000000143 |
| 14                                | 6                | 0.000001489            | 0.000000924  | 0.000001121  |
| 15                                | 6                | -0.000000210           | 0.000001988  | -0.000002887 |
| 16                                | 6                | -0.000001510           | -0.000005113 | 0.000006420  |
| 17                                | 6                | -0.000002701           | 0.000008134  | -0.000013757 |
| 18                                | 6                | 0.000002202            | 0.000002608  | 0.000006723  |
| 19                                | 6                | -0.000002832           | -0.000001748 | -0.000002437 |
| 20                                | 6                | 0.000013738            | -0.000003599 | 0.000009891  |
| 21                                | 16               | -0.000014554           | -0.000031555 | 0.000006528  |
| 22                                | 6                | 0.000033891            | 0.000044571  | -0.000002946 |
| 23                                | 6                | -0.000012652           | -0.000015218 | -0.000013278 |
| 24                                | 6                | -0.000002950           | 0.000002397  | 0.000014832  |
| 25                                | 6                | -0.000015511           | -0.000012229 | -0.000022467 |
| 26                                | 7                | -0.000005287           | -0.000018387 | 0.000015186  |
| 27                                | 7                | 0.000017462            | 0.000014928  | 0.000012834  |
| 28                                | 6                | 0.000000890            | -0.00000395  | -0.000016792 |
| 29                                | 6                | -0.000001096           | 0.000001184  | 0.000008410  |
| 30                                | 6                | -0.000002019           | 0.000002215  | -0.000007653 |
| 31                                | 6                | 0.000003355            | 0.000006384  | -0.000000978 |
| 32                                | 6                | -0.000002449           | -0.000000344 | -0.000004322 |
| 33                                | 6                | 0.000000414            | -0.000003253 | 0.000004226  |
| 34                                | 6                | -0.000000297           | 0.000003179  | 0.000000032  |
| 35                                | 6                | -0.000001834           | -0.000000296 | -0.000003239 |
| 36                                | 6                | 0.000000114            | -0.00000225  | 0.000000219  |
| 37                                | 6                | -0.000000498           | 0.000000482  | -0.000000226 |
| 38                                | 6                | 0.000001029            | -0.000000432 | 0.000003371  |
| 39                                | 8                | -0.000000858           | -0.000024677 | 0.000001863  |

|    |    |              |              |              |
|----|----|--------------|--------------|--------------|
| 40 | 29 | -0.000013380 | 0.000031611  | 0.000001015  |
| 41 | 1  | 0.000000050  | -0.000000080 | -0.000000006 |
| 42 | 1  | 0.000000096  | -0.000000060 | -0.000000388 |
| 43 | 1  | 0.000001193  | -0.000000347 | 0.000000253  |
| 44 | 1  | 0.000000858  | 0.000001295  | 0.000000883  |
| 45 | 1  | -0.000000293 | -0.000000419 | 0.000000314  |
| 46 | 1  | -0.000000127 | -0.000000813 | 0.000000292  |
| 47 | 1  | 0.000000108  | 0.000000153  | 0.000000117  |
| 48 | 1  | -0.000000254 | 0.000000204  | 0.000000106  |
| 49 | 1  | -0.000000103 | 0.000000024  | -0.000000363 |
| 50 | 1  | -0.000000494 | 0.000000097  | -0.000000556 |
| 51 | 1  | 0.000000295  | -0.000001008 | 0.000000327  |
| 52 | 1  | -0.000000231 | 0.000000579  | -0.000001040 |
| 53 | 1  | 0.000000362  | -0.000000266 | -0.000001330 |
| 54 | 1  | 0.000001011  | 0.000000527  | -0.000000318 |
| 55 | 1  | 0.000001492  | 0.000002548  | 0.000002833  |
| 56 | 1  | 0.000002406  | -0.000000956 | -0.000002797 |
| 57 | 1  | -0.000000328 | 0.000001901  | 0.000000955  |
| 58 | 1  | 0.000000440  | -0.000002572 | -0.000001111 |
| 59 | 1  | 0.000001251  | -0.000000305 | -0.000000433 |
| 60 | 1  | 0.000000020  | 0.000000100  | 0.000000584  |
| 61 | 1  | 0.000000029  | 0.000000125  | 0.000001071  |
| 62 | 1  | -0.000000511 | 0.000000864  | -0.000000216 |
| 63 | 1  | 0.000000518  | 0.000000395  | -0.000000334 |
| 64 | 1  | -0.000000428 | 0.000001679  | -0.000000728 |

---

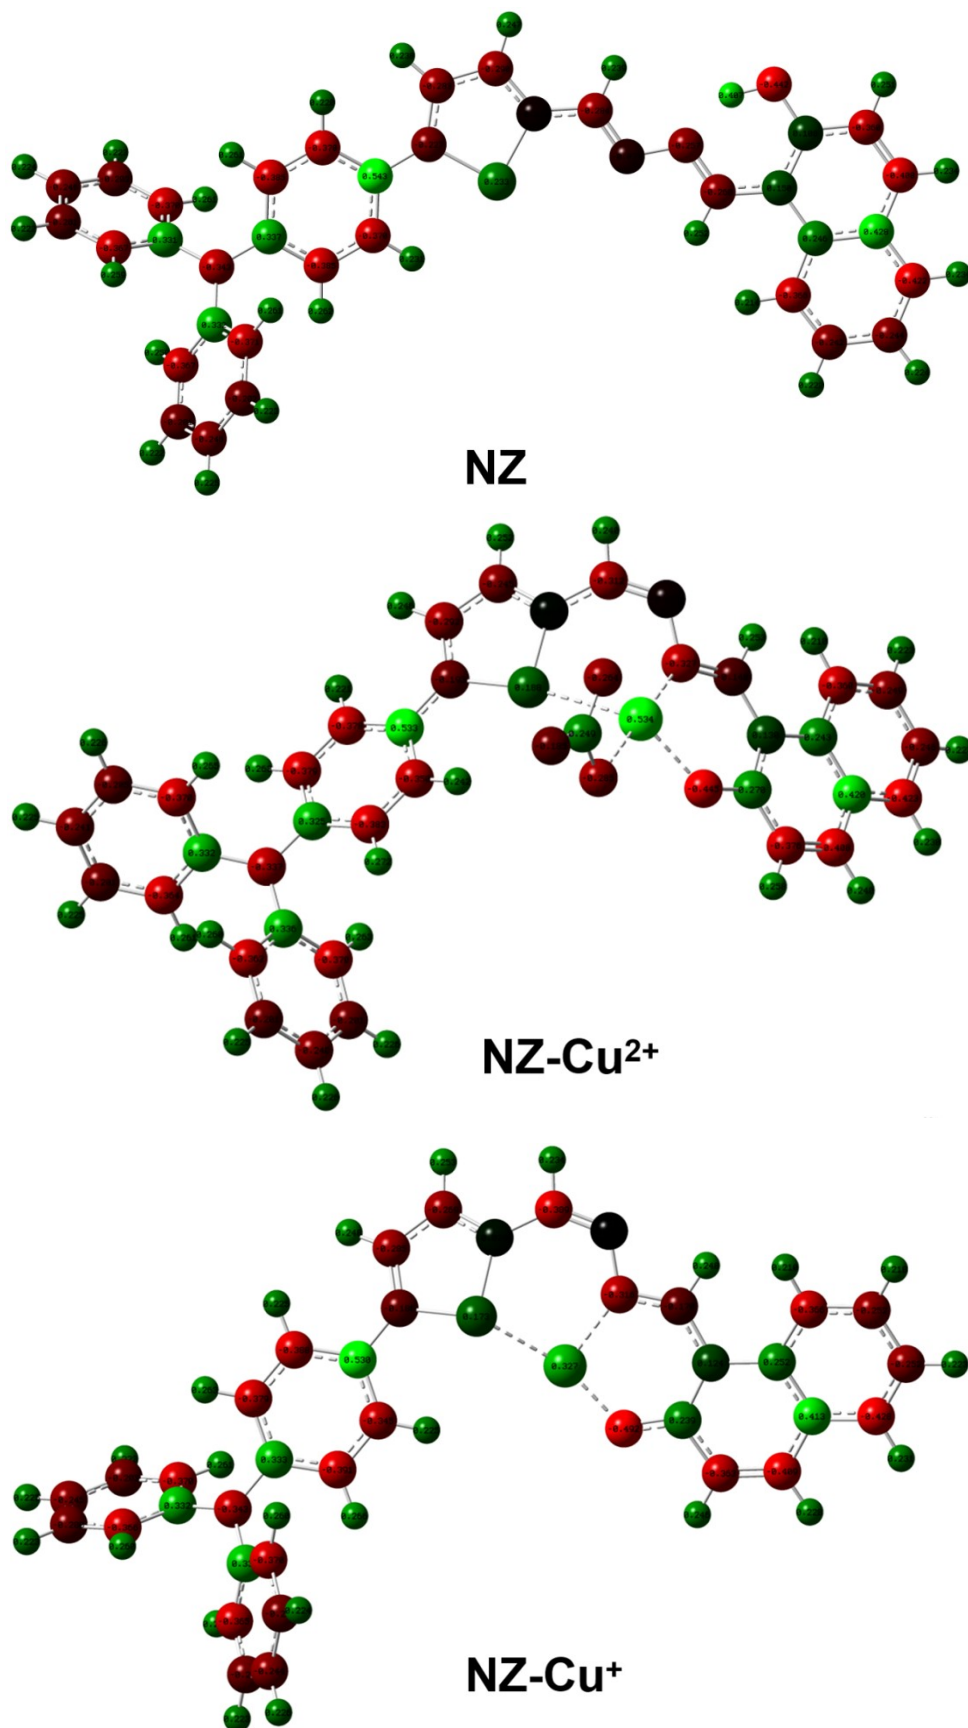

Fig. S9. NBO analyses of NZ, NZ-Cu<sup>2+</sup> and NZ-Cu<sup>+</sup>.

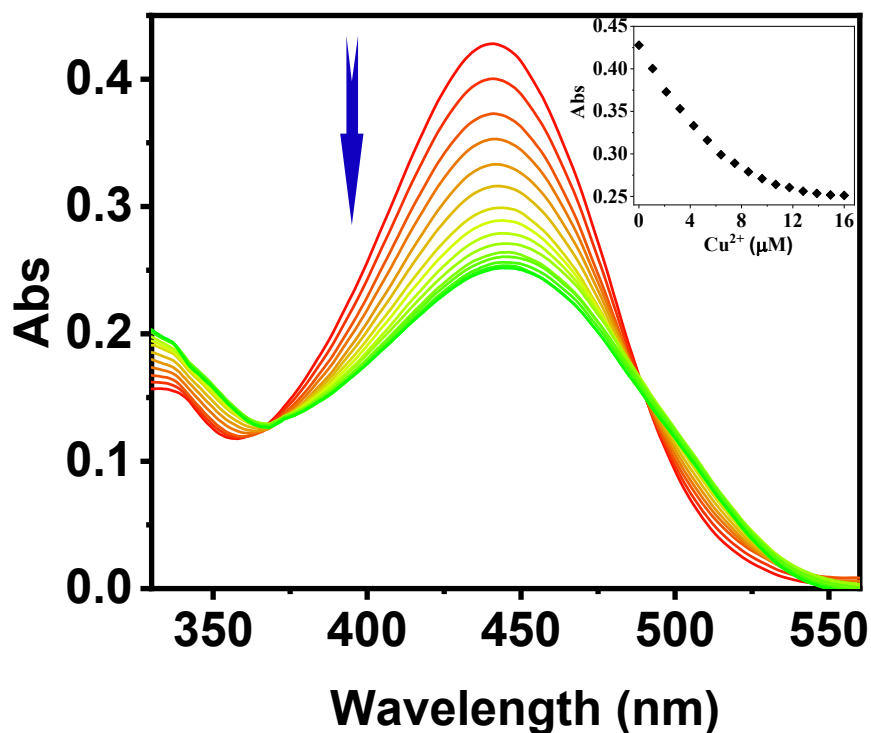

**Fig. S10.** UV-vis absorption spectra of NZ (10  $\mu\text{M}$ ) in the presence of different amounts of  $\text{Cu}^{2+}$  (0–16  $\mu\text{M}$ ) in HEPES aqueous buffer (DMSO:HEPES=6:4, 20 mM, pH=7.4). Inset: absorption of NZ at 439 nm as a function of different  $\text{Cu}^{2+}$  concentration.

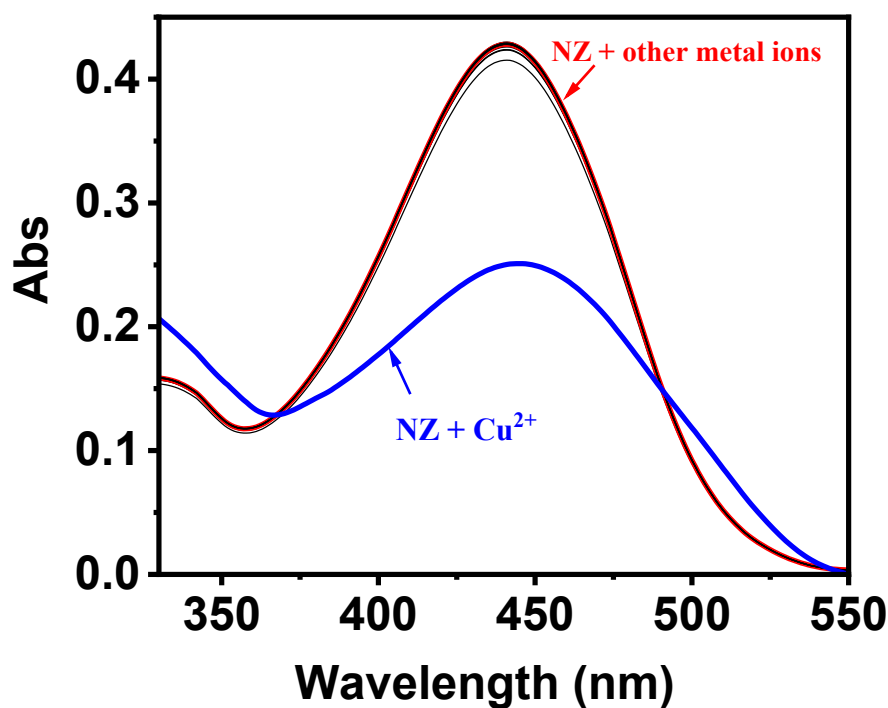

**Fig. S11.** UV-vis absorption spectra of NZ (10  $\mu\text{M}$ ) in HEPES aqueous buffer (DMSO:HEPES=6:4, 20 mM, pH=7.4) upon addition of 16  $\mu\text{M}$  various metal ions: 1.  $\text{Ca}^{2+}$ , 2.  $\text{Fe}^{3+}$ , 3.  $\text{Mg}^{2+}$ , 4.  $\text{Ni}^{2+}$ , 5.  $\text{Al}^{3+}$ , 6.  $\text{Hg}^{2+}$ , 7.  $\text{Zn}^{2+}$ , 8.  $\text{Ba}^{2+}$ , 9.  $\text{Co}^{3+}$ , 10.  $\text{K}^{+}$ , 11.  $\text{Na}^{+}$ , 12.  $\text{Ag}^{+}$ , 13.  $\text{Cr}^{3+}$ , 14.  $\text{Cd}^{2+}$ , 15.  $\text{Li}^{+}$ , 16.  $\text{Pb}^{2+}$ , 17.  $\text{Cu}^{2+}$  and 18. blank.

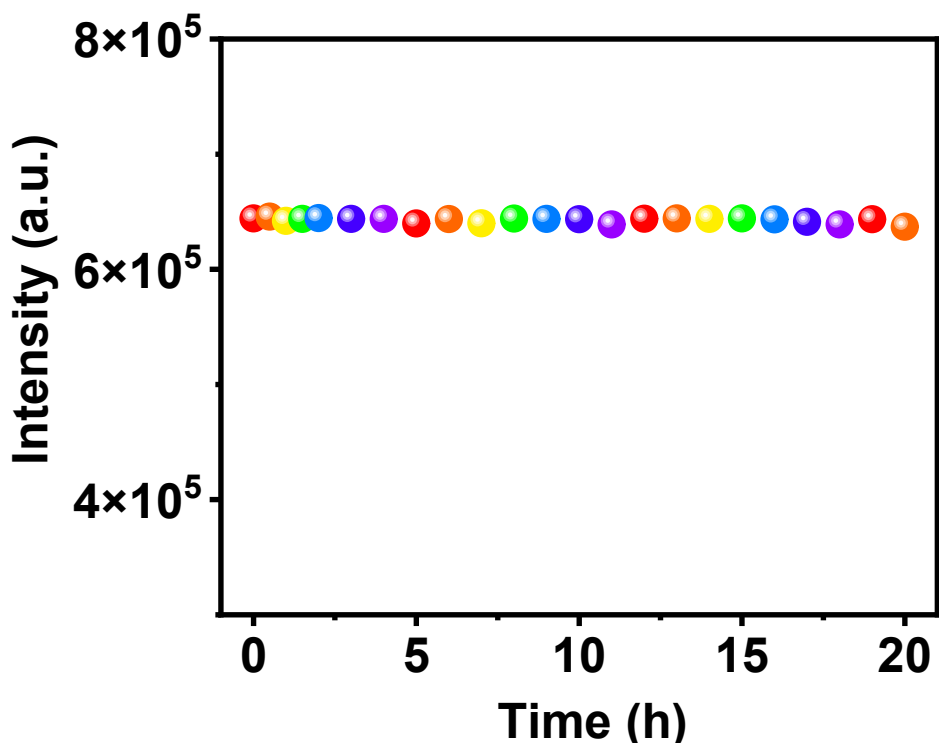

**Fig. S12.** Fluorescence intensity of NZ (10  $\mu\text{M}$ ) at different time in HEPES aqueous buffer (DMSO:HEPES=6:4, 20 mM, pH=7.4) ( $\lambda_{ex}$ =439 nm,  $\lambda_{em}$ =640 nm).

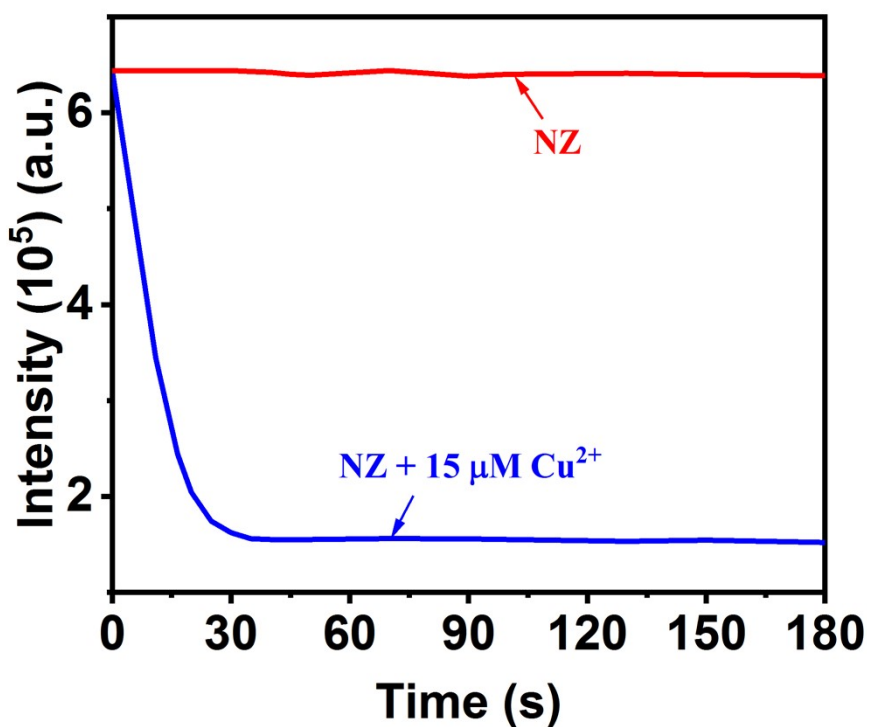

**Fig. S13.** Time-dependent fluorescence response at 640 nm of NZ in the presence of Cu<sup>2+</sup> (0 and 15  $\mu\text{M}$ ) in HEPES aqueous buffer (DMSO:HEPES=6:4, 20 mM, pH=7.4).

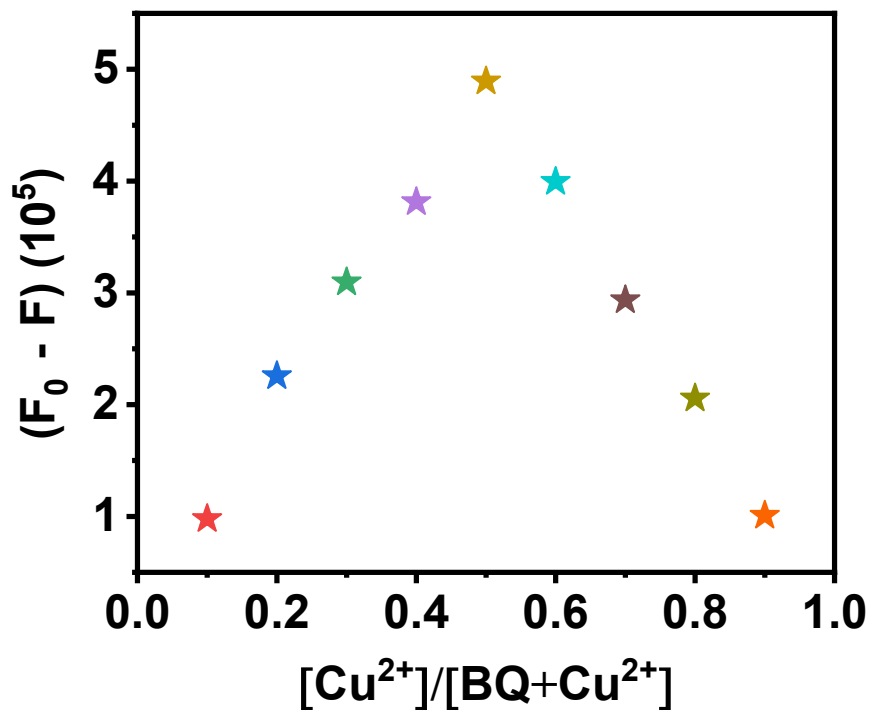

**Fig. S14.** Job's plot of NZ toward Cu<sup>2+</sup> in HEPES aqueous buffer solution (DMSO:HEPES=6:4, 20mM, pH=7.4). The total concentration of NZ and Cu<sup>2+</sup> was 10 μM ( $\lambda_{ex}$ =439 nm,  $\lambda_{em}$ =640 nm).

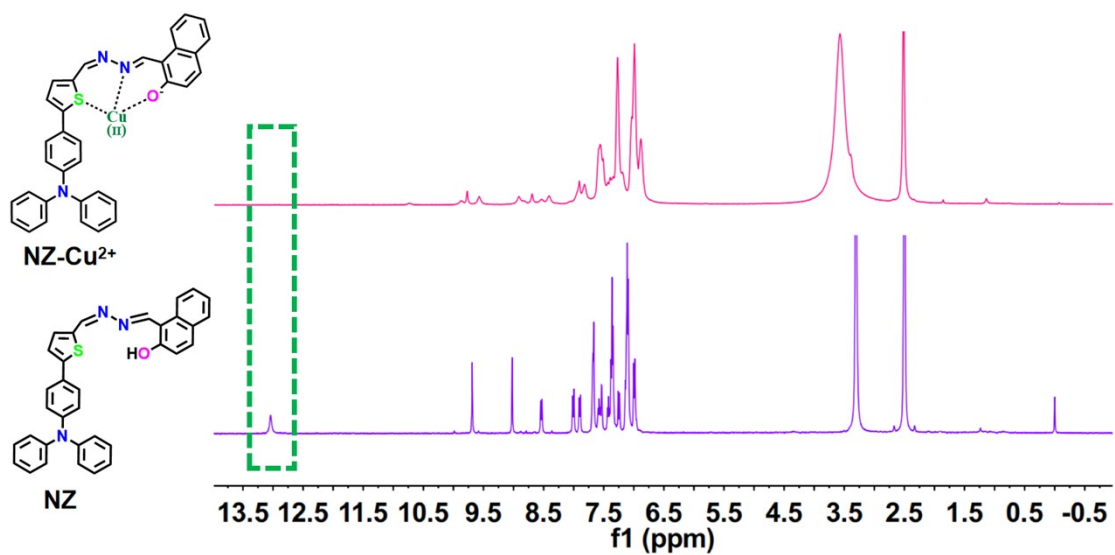

**Fig. S15.** <sup>1</sup>H NMR of NZ in the absence and presence of Cu(NO<sub>3</sub>)<sub>2</sub> in D<sub>2</sub>O/DMSO-*d*<sub>6</sub> mixed solution.

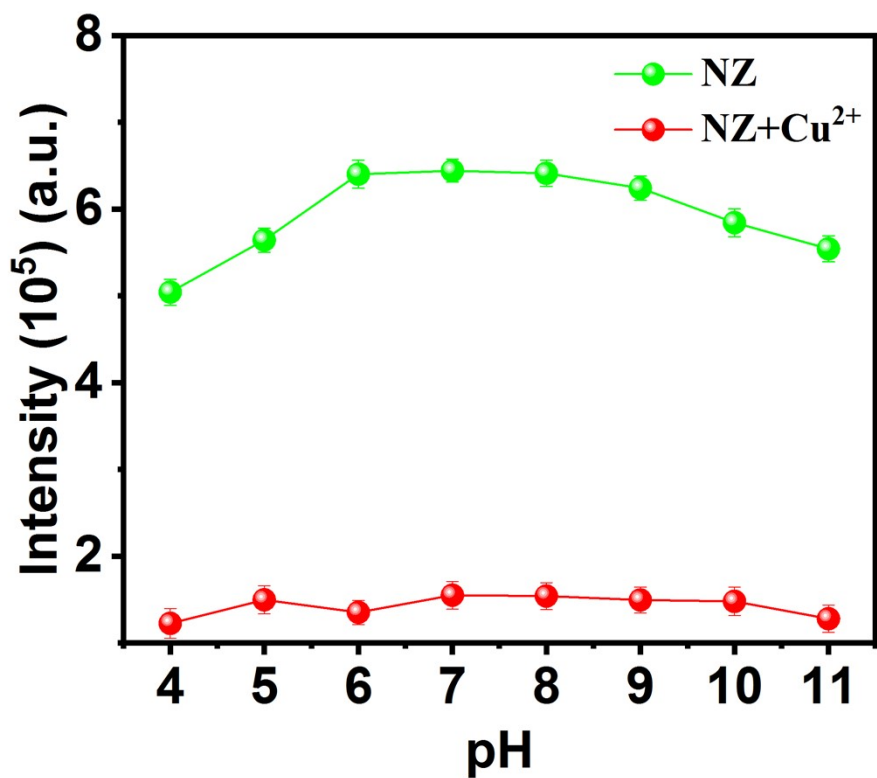

Fig. S16. Influences of pH on the fluorescence intensity of NZ (10  $\mu$ M) in the absence and presence of Cu<sup>2+</sup> (14  $\mu$ M), ( $\lambda_{ex}$ =439 nm,  $\lambda_{em}$ =640 nm).

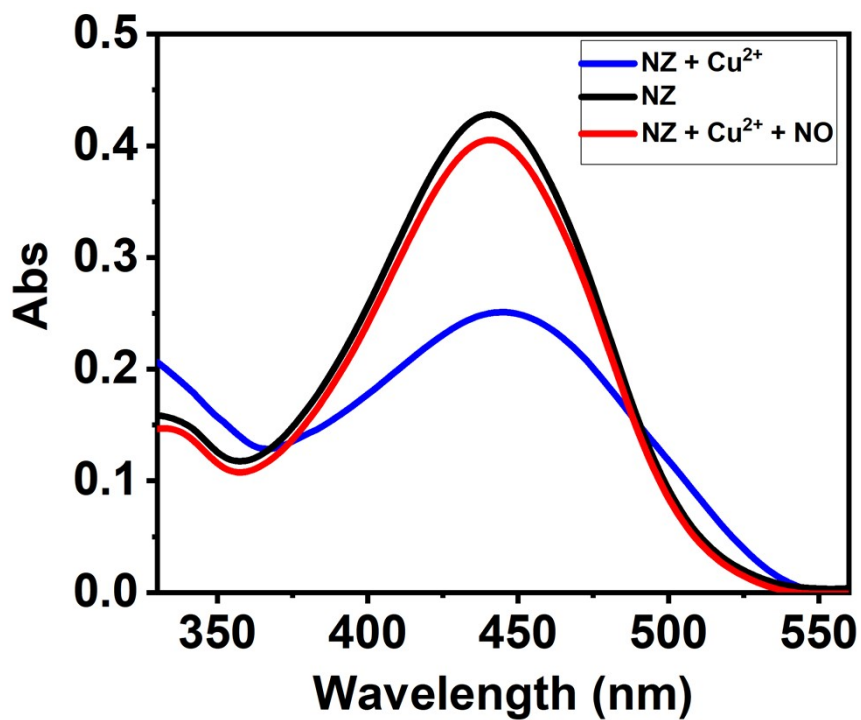

Fig. S17. UV-vis absorption spectra of NZ, NZ-Cu<sup>2+</sup> and NZ-Cu<sup>2+</sup> with NO (10.5  $\mu$ M) in DMSO/HEPES (6:4, v/v, pH=7.4, 20 mM).

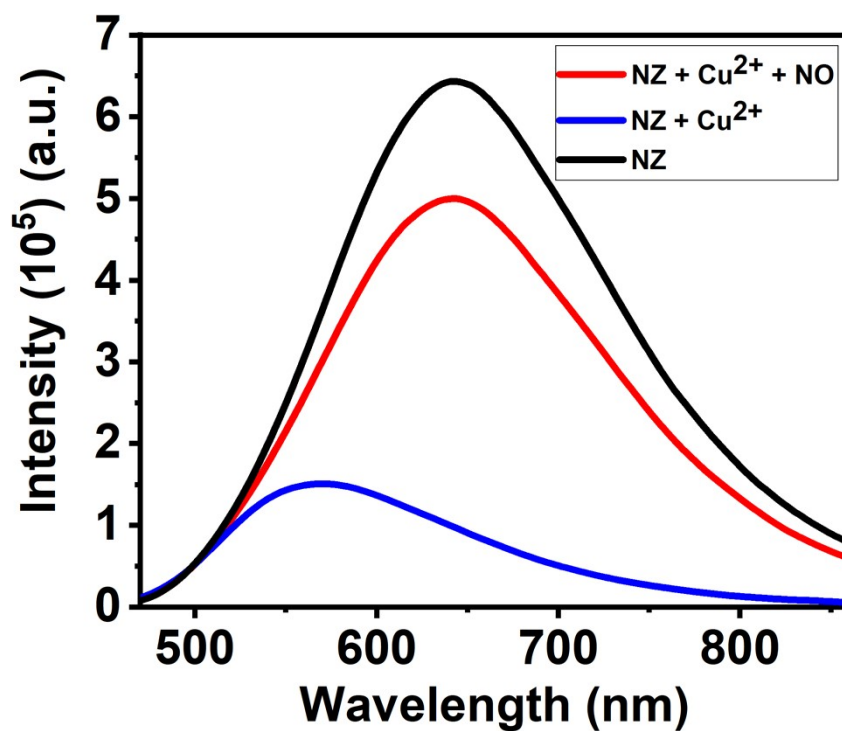

**Fig. S18.** Fluorescence spectra of NZ, NZ-Cu<sup>2+</sup> and NZ-Cu<sup>2+</sup> with NO (10.5 μM) in DMSO/HEPES (6:4, v/v, pH=7.4, 20 mM).

**Table S4.** Comparison of probe NZ-Cu<sup>2+</sup> with reported NO fluorescent probes.

| Probes                   | Emission wavelength | Detection limit | Response time | Detection of NO in live animals | Ref. |
|--------------------------|---------------------|-----------------|---------------|---------------------------------|------|
| 1-copper(II)             | 534 nm              | ---             | 7.9 min       | No                              | S2   |
| L2                       | 532 nm              | 1.6 nM          | ---           | No                              | S3   |
| RB-TP                    | 580 nm              | 5 nM            | 20 min        | No                              | S4   |
| RB-Py                    | 590 nm              | 20 nM           | 20 min        | No                              | S4   |
| LJ-1                     | 365 nm              | 10 nM           | 2 h           | No                              | S5   |
| FL3A-P <sub>9</sub> K-CC | 520 nm              | 82 nM           | 120 s         | No                              | S6   |
| FL3A-P <sub>pz</sub> -CC | 520 nm              | 21 nM           | 150 s         | No                              | S6   |
| TRP                      | 580 nm              | 1.8 μM          | 50 min        | No                              | S7   |
| PIP                      | 560 nm              | ---             | 700 s         | No                              | S8   |
| 1                        | 580 nm              | 0.18 μM         | 10 min        | No                              | S9   |



|                                         |        |         |        |       |                  |
|-----------------------------------------|--------|---------|--------|-------|------------------|
| <b>A6</b>                               | 533 nm | 24 nM   | 10 min | No    | S10              |
| <b>PYNO</b>                             | 481 nm | 163 nM  | 15 s   | Mouse | S11              |
| <b>PYSNO</b>                            | 548 nm | 242 nM  | 15 s   | Mouse | S11              |
| <b>1</b>                                | 558 nm | 31 nM   | 30 min | No    | S12              |
| <b>PyDA-NP</b>                          | 523 nm | 2.13 pM | ---    | No    | S13              |
| <b>FP-H<sub>2</sub>O<sub>2</sub>-NO</b> | 581 nm | ---     | 15 min | NO    | S14              |
| <b>NZ</b>                               | 640 nm | 12.9 nM | 60 s   | Mouse | <b>This work</b> |

## References

- [S1] Z. Y. Shang, J. H. Liu, Z. Z. Hu, Q. T. Meng, Y. Wang, R. Zhang and Z. Q. Zhang, *Dyes Pigments*, 2022, **200**, 110119.
- [S2] X. L. Sun, G. Kim, Y. F. Xu, J. Yoon and T. D. James, *ChemPlusChem Communications*, 2016, **81**, 30–34.
- [S3] R. Alam, T. Mistri, P. Mondal, D. Das, S. K. Mandal, A. R. Khuda-Bukhsh and M. Ali, *Dalton Transactions*, 2014, **43**, 2566–2576.
- [S4] Q. T. Meng, Y. X. Zhang, D. Y. Hou, G. Xin, T. C. Li, C. He and C. Y. Duan, *Tetrahedron*, 2013, **69**, 636–641.
- [S5] J. Mou, H. Qi, R. Xiang, S. F. Xu, J. Liu, S. H. Meng, N. H. Chen, Y. S. Xue and D. S. Pei, *New J. Chem.*, 2021, **45**, 2958–2966.
- [S6] A. Loas and S. J. Lippard, *J. Mater. Chem. B*, 2017, **5**, 8929–8933.
- [S7] Z. C. Dai, L. Tian, B. Song, X. L. Liu and J. L. Yuan, *Chem. Sci.*, 2017, **8**, 1969–1976.
- [S8] A. S. M. Islam, M. Sasmal, D. Maiti, A. Dutta, S. Ganguly, A. Katarkar, S. Gangopadhyay and M. Ali, *ACS Appl. Bio Mater.*, 2019, **2**, 1944–1955.
- [S9] C. Wu, K. -J. Wu, T. -S. Kang, H. -M. D. Wang, C. -H. Leung, J. -B. Liu and D. -L. Ma, *Sci. Rep.*, 2018, **8**, 12467–12472.
- [S10] S. Biswas, Y. Rajesh, S. Barman, M. Bera, A. Paul, M. Mandal and N. D. P. Singh, *Chem. Commun.*, 2018, **54**, 7940–7943.
- [S11] T. L. Zhou, J. D. Wang, J. M. Xu, C. X. Zheng, Y. Niu, C. Wang, F. R. Xu, L. Yuan, X. Zhao, L. Liang and P. Xu, *Anal. Chem.*, 2020, **92**, 5064–5072.
- [S12] X. -X. Chen, L. -Y. Niu, N. Shao and Q. -Z. Yang, *Anal. Chem.*, 2019, **91**, 4301–4306.

[S13] A. S. M. Islam, M. Sasmal, D. Maiti, A. Dutta, B. Show and M. Ali, *ACS Omega*, 2018, **3**, 10306–10316.

[S14] L. Yuan, W. Y. Lin, Y. A. Xie, B. Chen and S. S. Zhu, *J. Am. Chem. Soc.*, 2012, **134**, 1305–1315.
